# Supplementary material
Source: publisher figshare collection journal article supplement (https://acs.figshare.com/ndownloader/files/17918993)
Supplement: Supplementary file 1 [file 17918993]

# Zirconium Phosphate: The Pathway from Turbostratic Disorder to Crystallinity

*Aida Contreras-Ramirez<sup>‡</sup>, Songsheng Tao<sup>†</sup>, Gregory S. Day<sup>‡</sup>, Vladimir I. Bakhmutov<sup>‡</sup>, Simon J. L. Billinge<sup>\*†‡</sup>,  
and Hong-Cai Zhou<sup>\* § ‡</sup>.*

<sup>‡</sup> Department of Chemistry, Texas A&M University, College Station, TX 77843, USA

<sup>†</sup> Department of Applied Physics and Applied Mathematics, Columbia University, New York, NY 10027.

<sup>§</sup>Department of Materials Science and Engineering, Texas A&M University, College Station, Texas 77843-3003, United States.

<sup>‡</sup> Condensed Matter Physics and Materials Science Department, Brookhaven National Laboratory, Upton, NY 11973

## Supplementary Information

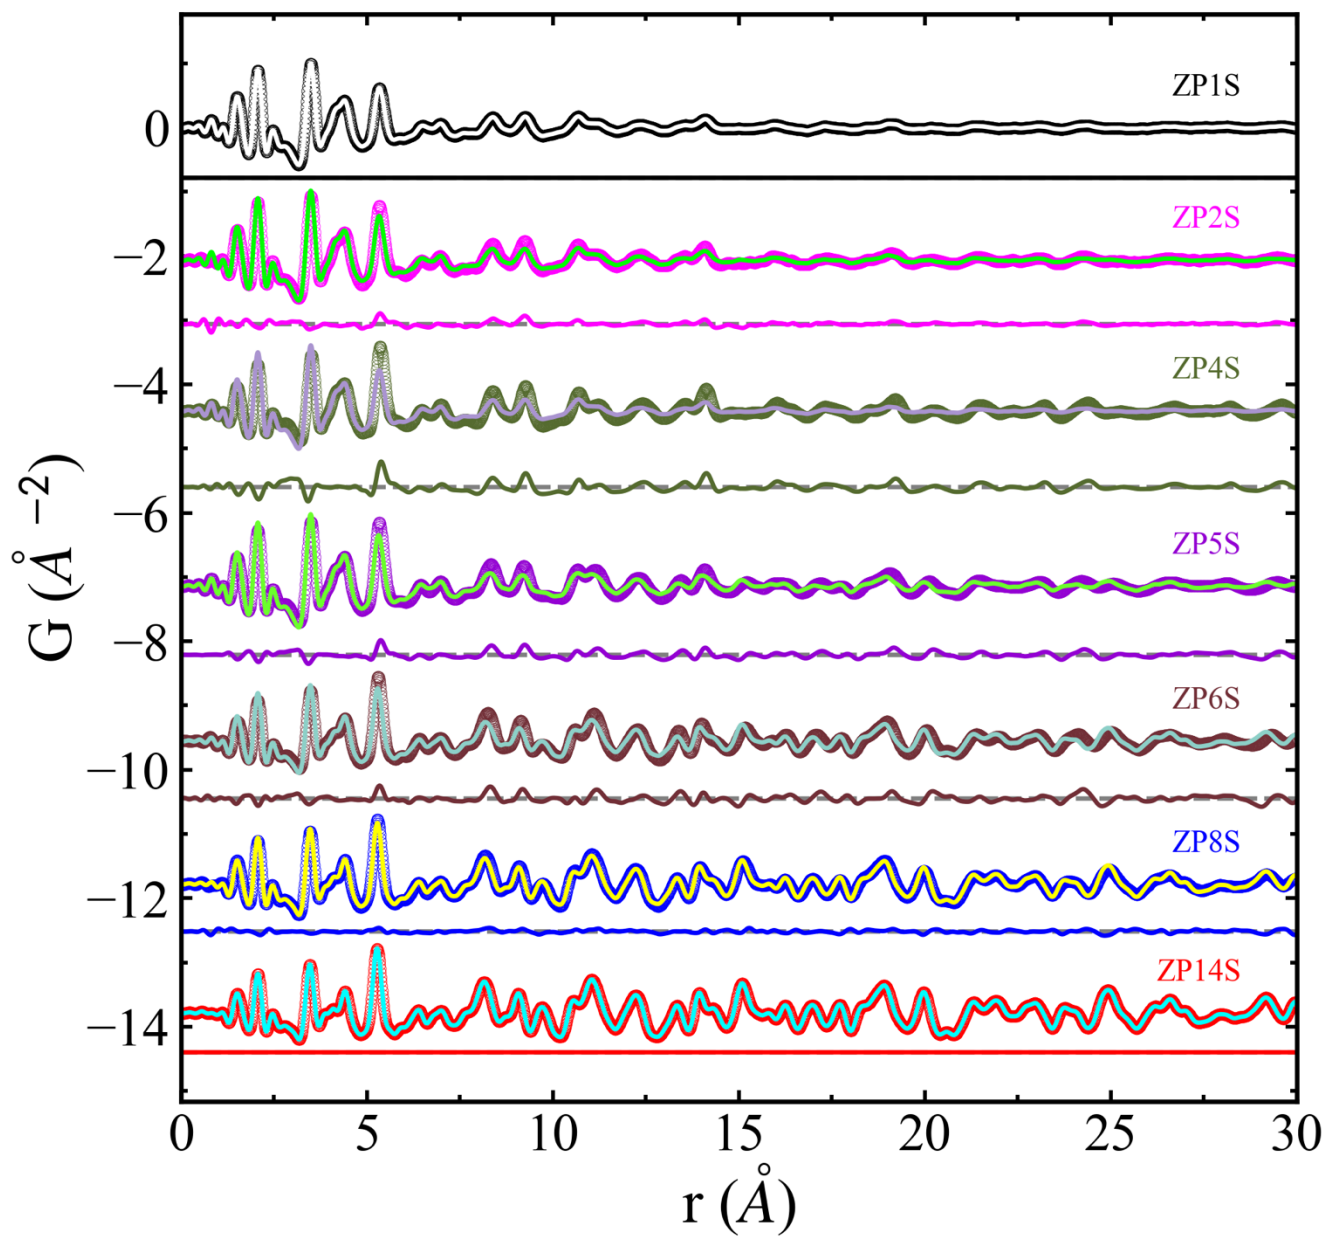

**Figure S1.** Experimental PDFs of S-series (empty dots) and fitted linear combination of PDFs of ZP1S and ZP14S (solid line) with the difference curves below.

**Table S1. Refined parameters in S-series.**

|                                                        | ZP1S    | ZP2S    | ZP4S    | ZP5S    | ZP6S    | ZP8S    | ZP14S   |
|--------------------------------------------------------|---------|---------|---------|---------|---------|---------|---------|
| <b>scale<sub>bulk</sub></b>                            | 0.466   | 0.302   | 0.138   | 0.110   | 0.315   | 0.242   | 0.363   |
| <b>psize (Å)</b>                                       | 8.324   | 8.968   | 17.432  | 61.511  | 88.754  | 230.307 | 281.749 |
| <b>a (Å)</b>                                           | 10.089  | 9.758   | 9.841   | 9.189   | 9.121   | 9.069   | 9.069   |
| <b>b (Å)</b>                                           | 5.221   | 5.291   | 5.439   | 5.278   | 5.295   | 5.289   | 5.283   |
| <b>c (Å)</b>                                           | 13.918  | 14.268  | 15.299  | 15.383  | 15.419  | 15.394  | 15.390  |
| <b>β<sub>bulk</sub></b>                                | 108.026 | 107.712 | 108.431 | 101.124 | 101.641 | 101.700 | 101.653 |
| <b>U<sub>Zr</sub><sup>bulk</sup> (Å<sup>-2</sup>)</b>  | 0.002   | 0.005   | 0.004   | 0.007   | 0.006   | 0.007   | 0.005   |
| <b>U<sub>P</sub><sup>bulk</sup> (Å<sup>-2</sup>)</b>   | 0.000   | 0.000   | 0.002   | 0.006   | 0.006   | 0.006   | 0.005   |
| <b>U<sub>O</sub><sup>bulk</sup> (Å<sup>-2</sup>)</b>   | 0.016   | 0.031   | 0.054   | 0.041   | 0.031   | 0.027   | 0.023   |
| <b>scale<sub>layer</sub></b>                           | 0.183   | 0.230   | 0.259   | 0.285   | 0.266   | 0.138   | 0.119   |
| <b>x scale</b>                                         | 1.005   | 1.009   | 1.017   | 1.009   | 1.006   | 1.001   | 1.011   |
| <b>y scale</b>                                         | 0.996   | 1.015   | 1.011   | 1.017   | 1.006   | 1.006   | 0.989   |
| <b>z scale</b>                                         | 1.000   | 0.980   | 0.967   | 0.977   | 0.993   | 0.992   | 1.004   |
| <b>U<sub>Zr</sub><sup>layer</sup> (Å<sup>-2</sup>)</b> | 0.008   | 0.009   | 0.007   | 0.010   | 0.008   | 0.012   | 0.017   |
| <b>U<sub>P</sub><sup>layer</sup> (Å<sup>-2</sup>)</b>  | 0.009   | 0.013   | 0.009   | 0.006   | 0.004   | 0.023   | 0.023   |
| <b>U<sub>O</sub><sup>layer</sup> (Å<sup>-2</sup>)</b>  | 0.016   | 0.027   | 0.029   | 0.038   | 0.022   | 0.047   | 0.053   |
| <b>δ (Å)</b>                                           | 1.834   | 1.912   | 1.826   | 1.927   | 1.913   | 3.230   | 3.260   |

Figure S2 shows the different FT-IR spectra for  $\alpha$ ZrP prepared by the stirring, reflux, and hydrothermal methods. The FT-IR spectrum for ZP8R and ZP14H200 show a broad stretching band typical of water at 3600-2500 cm<sup>-1</sup> and a bending band ( $\delta$ (H-O-H)) at 1620 cm<sup>-1</sup>. A weak shoulder at 1245 cm<sup>-1</sup> is attributed to ( $\nu$ (P=O)). The large and broad band at 1020 cm<sup>-1</sup> corresponds to the symmetric stretching of P-O bond in the PO<sub>4</sub> group and a shoulder at 950 cm<sup>-1</sup> to ( $\delta$ (P-OH)). The bands at 600 cm<sup>-1</sup>, 460 cm<sup>-1</sup> and 400 cm<sup>-1</sup> are attributed to the Zr-O bond.<sup>1-4</sup>

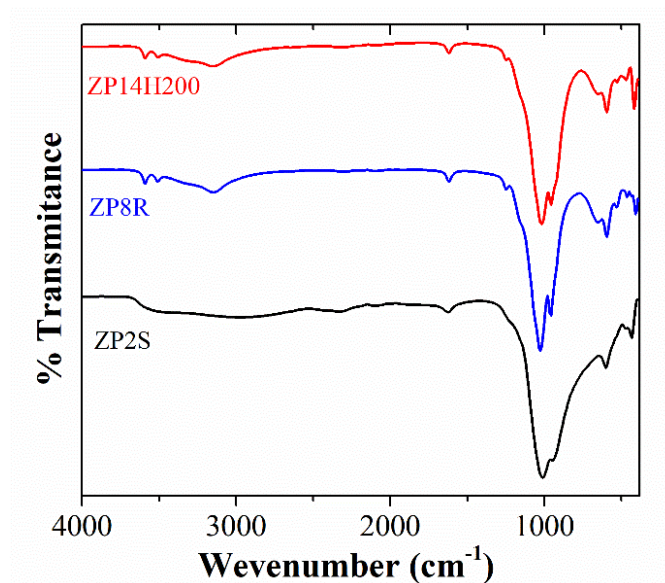

**Figure S2. FT-IR spectra for ZrP prepared by stirring, hydrothermal, and reflux methods.**

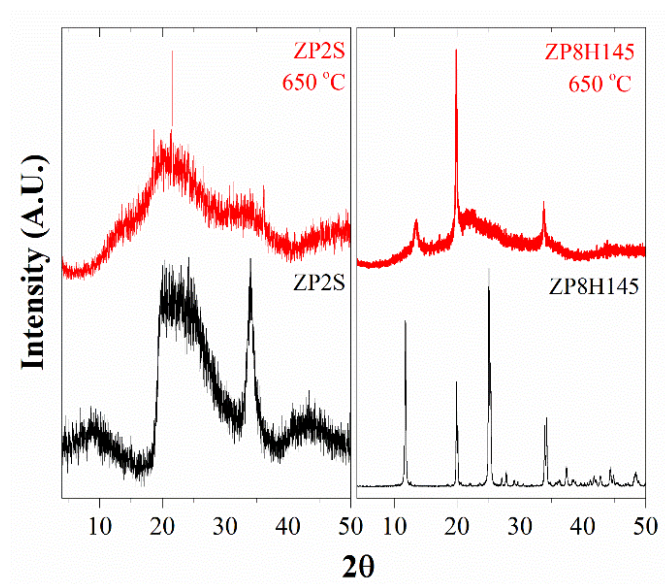

**Figure S3. PXRD pattern of ZP2S and ZP8H145 after annealing at 650 °C for 2 hours.**

The FT-IR spectra for the samples after temperature treatment are presented in Figure S4. From 4000  $\text{cm}^{-1}$  to 1800  $\text{cm}^{-1}$  no bands are observed. The assignment of the  $\text{P}_2\text{O}_7^{4-}$  modes are given in terms of  $\text{PO}_3$  and P-O-P vibration.<sup>5</sup> The symmetric and asymmetric stretching frequencies of  $\text{PO}_3$  are observed in the 1157-1100  $\text{cm}^{-1}$  region. For P-O-P, symmetric modes were observed around 760  $\text{cm}^{-1}$ . The bands between 590 and 440  $\text{cm}^{-1}$  are attributed to  $\delta$  O-P-O,  $\delta$   $\text{PO}_3$  and  $\delta$  P-O-P deformations.<sup>5-6</sup> These spectra demonstrate the formation of  $\text{ZrP}_2\text{O}_7$  in the turbostratic and in the crystalline samples.

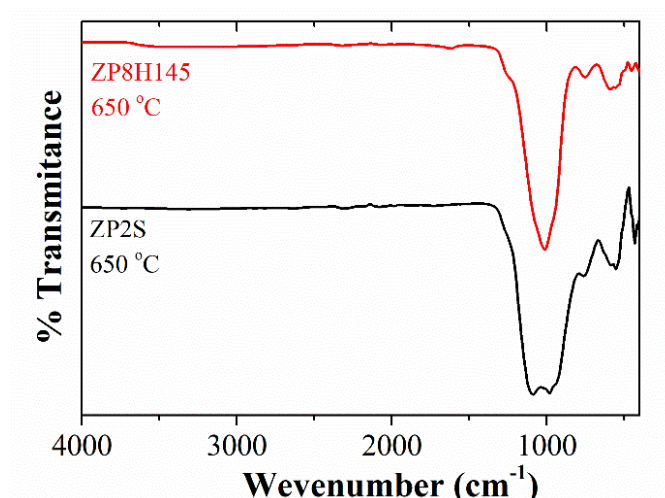

**Figure S4. FT-IR spectra for ZP2S and ZP8H145 after annealing at 650 °C for 2 hours.**

The  $^{31}\text{P}\{^1\text{H}\}$  MAS NMR spectrum of ZP2S (Figure S5), recorded at a spin rate of 4 kHz, shows a major resonance at -23.4 ppm due to orthophosphate ( $\text{HPO}_4^{2-}$ ). A short and well-defined peak at -15.3 ppm could be attributed to the resonance of phosphate within a more hydrated area. Meanwhile, a shoulder to the right of the main resonance, -29.1 ppm, could be attributed to a dehydrated phase of ZrP.<sup>7-8</sup> The wide peaks on the spectrum suggest that the material is not homogeneous, which is in good agreement with the PDF data.

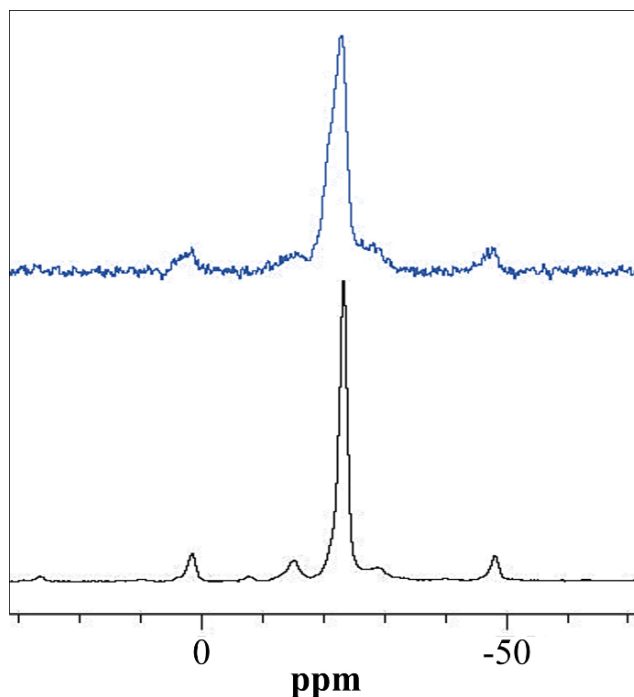

**Figure S5.  $^{31}\text{P}\{^1\text{H}\}$  MAS NMR spectra of ZP2S at a spinning rate of 4 kHz from top to bottom: the spectrum obtained with direct excitation of  $^{31}\text{P}$  nuclei; the spectrum obtained with proton-phosphorus cross polarization.**

The  $^1\text{H}$  MAS NMR spectrum of  $\alpha\text{ZrP}$  is shown in Figure S6. The  $^1\text{H}$  MAS NMR spectrum of ZP2S and ZP8H200 at a spin rate of 5.1 kHz. As expected, this spectrum is not informative due to strong proton-proton dipolar interactions. Nevertheless, the  $^1\text{H}$  MAS NMR spectrum for ZP8H200 (bottom) shows a major resonance at 6.1 ppm and a second resonance at 7.6 ppm, these resonances belong to protons of water situated between layers and also protons P–OH (b).<sup>9</sup> ZP2S spectrum (top) shows two resonances at 8.4 and 6.3 ppm, which can be assigned to protons of water and  $\text{HPO}_4^{2-}$  groups.

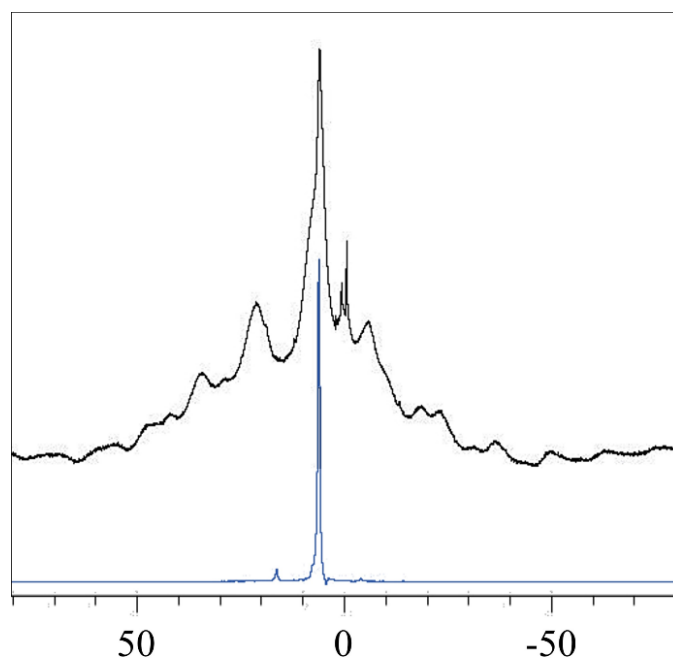

**Figure S6.** The  $^1\text{H}$  MAS NMR spectrum of ZP2S(top), ZP8H200(bottom) spinning at a rate of 5.1 kHz.

**Table S2. Refined parameters in H-series.**

|                                                          | ZP2H    | ZP2H    | ZP2H    | ZP8H    | ZP8H    | ZP8H    | ZP14H   | ZP14H   | ZP14H   |
|----------------------------------------------------------|---------|---------|---------|---------|---------|---------|---------|---------|---------|
|                                                          | 90      | 145     | 200     | 90      | 145     | 200     | 90      | 145     | 200     |
| $\text{scale}_{\text{bulk}}$                             | 0.566   | 0.51    | 0.451   | 0.397   | 0.373   | 0.401   | 0.439   | 0.339   | 0.431   |
| $\text{psize } (\text{\AA})$                             | 51.769  | 62.471  | 136.642 | 187.487 | 135.484 | 260.767 | 154.904 | 116.416 | 108.336 |
| $a \text{ } (\text{\AA})$                                | 9.09    | 9.077   | 9.063   | 9.066   | 9.07    | 9.067   | 9.075   | 9.073   | 9.093   |
| $b \text{ } (\text{\AA})$                                | 5.322   | 5.312   | 5.289   | 5.288   | 5.292   | 5.289   | 5.298   | 5.296   | 5.315   |
| $c \text{ } (\text{\AA})$                                | 15.333  | 15.342  | 15.393  | 15.409  | 15.401  | 15.411  | 15.368  | 15.398  | 15.316  |
| $\beta_{\text{bulk}}$                                    | 101.659 | 101.693 | 101.709 | 101.707 | 101.711 | 101.707 | 101.743 | 101.71  | 101.837 |
| $U_{\text{Zr}}^{\text{bulk}} \text{ } (\text{\AA}^{-2})$ | 0.005   | 0.005   | 0.005   | 0.005   | 0.005   | 0.005   | 0.005   | 0.005   | 0.005   |
| $U_{\text{P}}^{\text{bulk}} \text{ } (\text{\AA}^{-2})$  | 0.005   | 0.005   | 0.005   | 0.004   | 0.004   | 0.004   | 0.005   | 0.004   | 0.005   |
| $U_{\text{O}}^{\text{bulk}} \text{ } (\text{\AA}^{-2})$  | 0.009   | 0.009   | 0.012   | 0.012   | 0.011   | 0.013   | 0.011   | 0.011   | 0.011   |

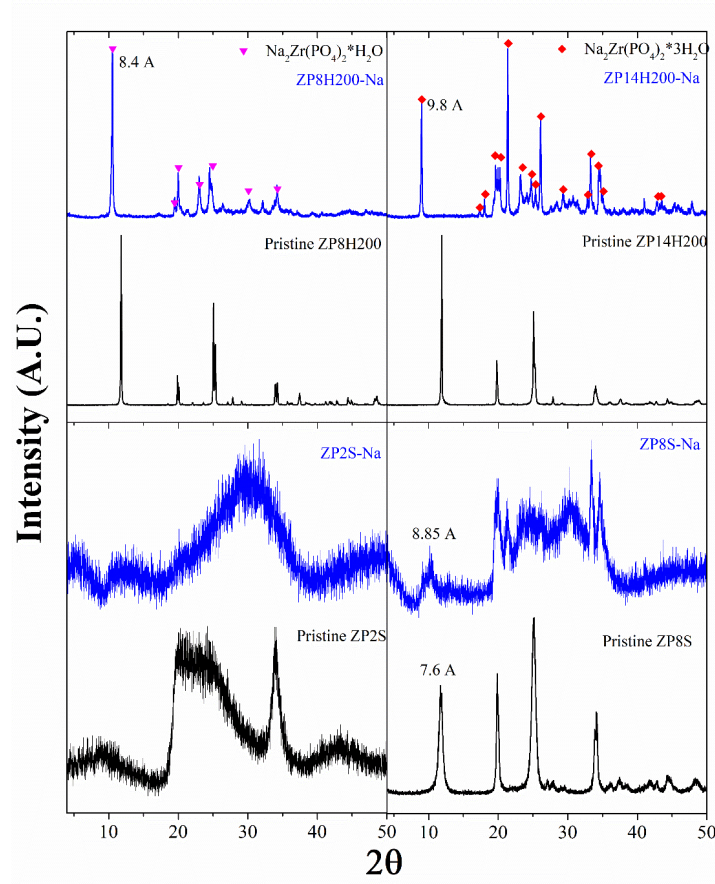

**Figure S7. PXRD pattern of pristine ZrP alongside the material after  $\text{Na}^+$  ion exchange.**

Figure S8 illustrates the identical  $^{31}\text{P}\{^1\text{H}\}$  MAS NMR spectra obtained by direct  $^{31}\text{P}$  excitation and proton-phosphorus cross polarization, of the sample ZP8H200. Showing that the phosphorus groups are surrounded by the same number of protons. Two signals are observed, one at -19.5 (very small) and another -21.2 ppm (in a ratio of 1 to 19) in full accordance with the data reported earlier for  $\alpha\text{ZrP}$ .<sup>10-11</sup> Both signals belong to  $\text{HPO}_4^{2-}$  orthophosphate groups located in more (-19.5 ppm) and less (-21.2 ppm) hydrated areas of  $\alpha\text{ZrP}$ . The most important feature of the spectra is the fact that in the sample of higher crystallinity, the major signal is narrower with a linewidth of 60-70 Hz.

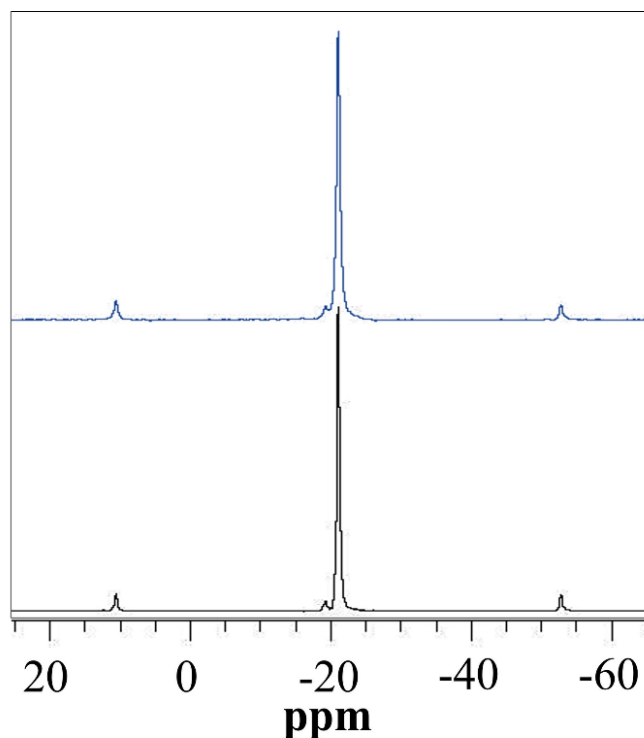

**Figure S8.  $^{31}\text{P}\{^1\text{H}\}$  MAS NMR spectra of ZP8H200 at a spinning rate of 5.1 kHz from top to bottom: the spectrum obtained with direct excitation of  $^{31}\text{P}$  nuclei; the spectrum obtained with proton-phosphorus cross polarization.**

To support this conclusion, we performed the  $^{31}\text{P}\{^1\text{H}\}$  CP MAS NMR experiments both with and without the spin-lock section shown in Figure S9. The  $^1\text{H}$  spin-lock X CP MAS NMR spectra manifest X resonances developed due to cross polarization via protons characterized by the longest  $^1\text{H}$   $T_{1\rho}$  times. Generally, the X CP signals at the  $^1\text{H}$  spin-lock are associated with a crystalline phase, while the spectral difference shows an amorphous phase.<sup>12</sup> As seen in Figure S6, the spectral difference is quite small, supporting the high crystallinity of the sample.



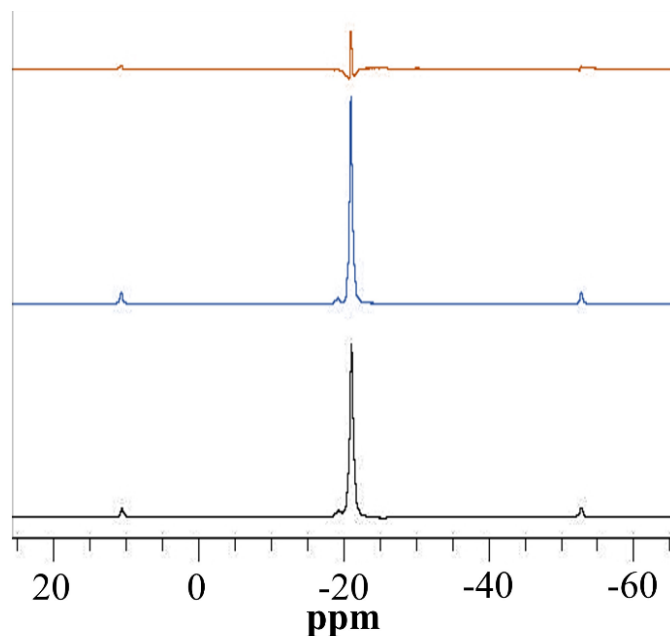

**Figure S9.  $^{31}\text{P}\{^1\text{H}\}$  CP MAS NMR spectrum (middle) and  $^{31}\text{P}\{^1\text{H}\}$   $^1\text{H}$  spin-lock CP MAS NMR spectrum at a spin-lock pulse length of 16 ms (bottom) recorded for sample ZP8H200, spinning at a rate of 5 kHz, the top spectra show the difference between the two.**

Figure S10 shows the high resolution XPS spectra for P 2p and Zr 3d, for ZP14H200 and ZP2S samples. The P  $2p_{3/2}$  and  $2p_{1/2}$  peaks overlap, giving one peak centered at 134.4-134.2 eV, respectively (Figure S7 a). The Zr  $3d_{5/2}$  and  $3d_{3/2}$  peaks are centered at 183.8-183.6 and 186.2-186.1 eV (Figure S7 b), these values are in strong agree with values previously reported.<sup>13-14</sup> The high-resolution scans for the Zr 3d and P 2p regions in the well crystallized sample (ZP14H200) show an increase in binding energy of  $\sim 0.2$  eV which indicates a difference in polarization. The binding energies are referenced to the C 1s line, which was fixed at 284.8 eV. The spectrum has been fitted using Gaussian, after a Shirley-type back ground subtraction.

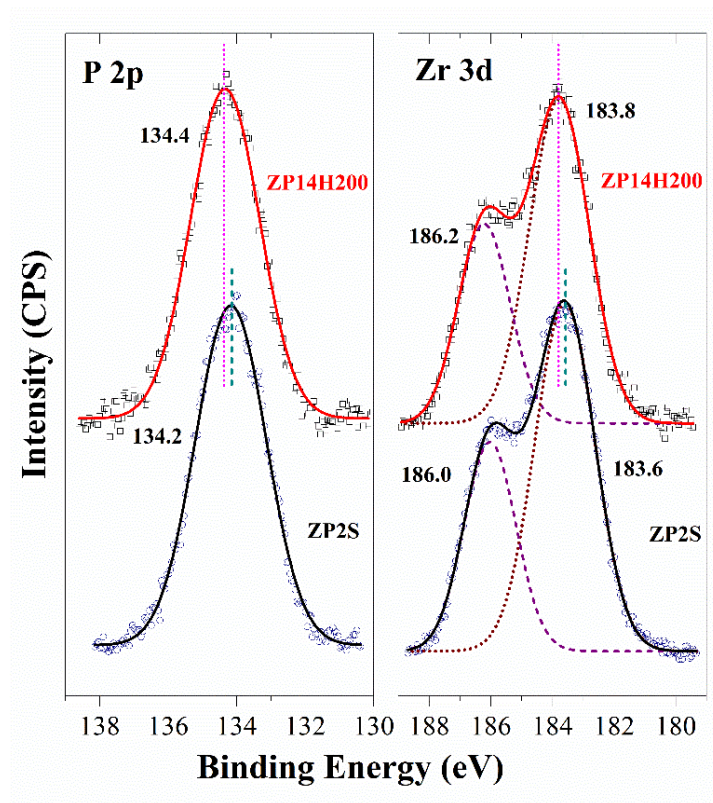

Figure S10. X-ray photoelectron spectra of ZP2S and ZP14H200: a) P 2p binding energy region; b) Zr 3d<sub>3/2</sub> and Zr 3d<sub>5/2</sub> binding energy region.

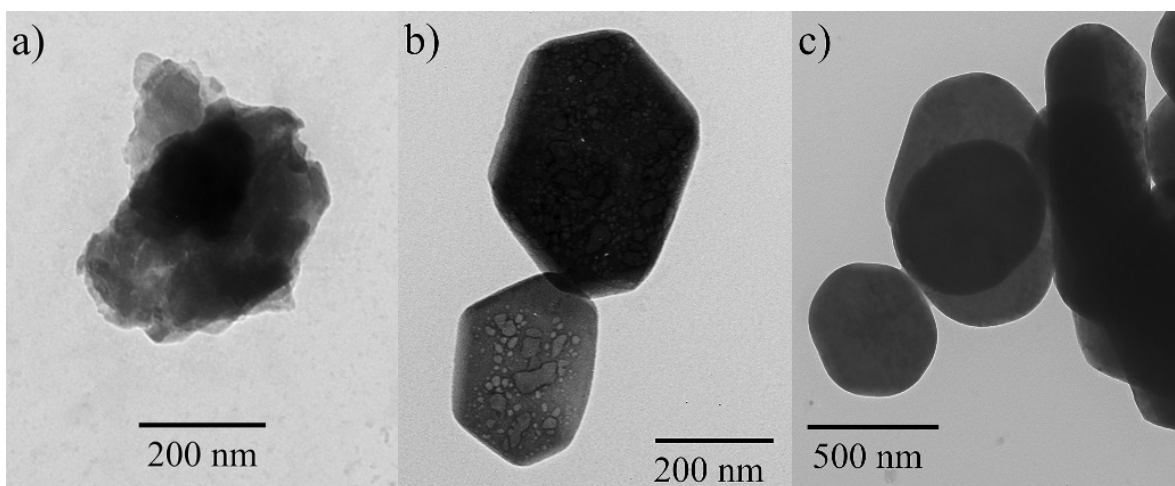

Figure S11. TEM images of H-samples series: a) ZP2H145, b) ZP8H145, c) ZP14H145.

**Table S3. Refined parameters in R-series.**

|                                                        | ZP2R    | ZP8R    | ZP14R   |
|--------------------------------------------------------|---------|---------|---------|
| <b>scale<sub>bulk</sub></b>                            | 0.2     | 0.505   | 0.459   |
| <b>psize (Å)</b>                                       | 25.471  | 152.354 | 177.744 |
| <b>a (Å)</b>                                           | 9.143   | 9.081   | 9.073   |
| <b>b (Å)</b>                                           | 5.452   | 5.452   | 5.452   |
| <b>c (Å)</b>                                           | 15.002  | 15.345  | 15.416  |
| <b>b<sub>bulk</sub></b>                                | 101.179 | 101.731 | 101.644 |
| <b>U<sub>Zr</sub><sup>bulk</sup> (Å<sup>-2</sup>)</b>  | 0.003   | 0.006   | 0.005   |
| <b>U<sub>P</sub><sup>bulk</sup> (Å<sup>-2</sup>)</b>   | 0.003   | 0.005   | 0.005   |
| <b>U<sub>O</sub><sup>bulk</sup> (Å<sup>-2</sup>)</b>   | 0.035   | 0.023   | 0.021   |
| <b>scale<sub>layer</sub></b>                           | 0.337   | 0.165   | 0.157   |
| <b>x scale</b>                                         | 1.004   | 1.01    | 1.007   |
| <b>y scale</b>                                         | 0.994   | 0.995   | 0.997   |
| <b>z scale</b>                                         | 1.205   | 1.002   | 1.003   |
| <b>U<sub>Zr</sub><sup>layer</sup> (Å<sup>-2</sup>)</b> | 0.011   | 0.013   | 0.02    |
| <b>U<sub>P</sub><sup>layer</sup> (Å<sup>-2</sup>)</b>  | 0.007   | 0.024   | 0.052   |
| <b>U<sub>O</sub><sup>layer</sup> (Å<sup>-2</sup>)</b>  | 0.028   | 0.059   | 0.101   |
| <b>d (Å)</b>                                           | 2.038   | 3.305   | 3.358   |

## References

1. Frey, B. L.; Hanken, D. G.; Corn, R. M., Vibrational Spectroscopic Studies of the Attachment Chemistry for Zirconium Phosphonate Multilayers at Gold and Germanium Surfaces. *Langmuir* **1993**, *9*, 1815-1820.
2. Bortun, A. I.; Khainakov, S. A.; Bortun, L. N.; Jaimez, E.; Garcia, J. R.; Clearfield, A., Synthesis and Characterization of a Novel Layered Tin(IV) Phosphate With Ion Exchange Properties. *Mater Res Bull* **1999**, *34*, 921-932.
3. Stuart, B. H., *Infrared Spectroscopy: Fundamentals and Applications*. 2004.
4. Jaimez, E.; Bortun, A.; Hix, G. B.; Garcia, J. R.; Rodriguez, J.; Slade, R. C. T., Synthesis of Phosphate-Phenylphosphonates of Titanium(IV) and Their n-Butylamine Intercalates. *J Chem Soc Dalton* **1996**, 2285-2292.
5. Seyyidoglu, S.; Ozenbas, M.; Yazici, N.; Yilmaz, A., Investigation of solid solution of ZrP2O7-Sr2P2O7. *J Mater Sci* **2007**, *42* (15), 6453-6463.
6. Guler, H.; Kurtulus, F., A microwave-assisted route for the solid-state synthesis of lead pyrophosphate, Pb2P2O7. *J Mater Sci* **2005**, *40* (24), 6565-6569.

7. Pica, M.; Donnadio, A.; Capitani, D.; Vivani, R.; Troni, E.; Casciola, M., Advances in the Chemistry of Nanosized Zirconium Phosphates: A New Mild and Quick Route to the Synthesis of Nanocrystals. *Inorg Chem* **2011**, *50* (22), 11623-11630.
8. Mosby, B. M.; Diaz, A.; Bakmutov, V.; Clearfield, A., Surface Functionalization of Zirconium Phosphate Nanoplatelets for the Design of Polymer Fillers. *Acs Applied Materials & Interfaces* **2014**, *6*, 585-592.
9. Bakmutov, V. I.; Clearfield, A., P-31, H-1 NMR Relaxation and Molecular Mobility in Layered alpha-Zirconium Phosphate: Variable-Temperature NMR Experiments. *Journal of Physical Chemistry C* **2017**, *121* (1), 550-555.
10. Segawa, K.; Nakajima, Y.; Nakata, S.; Asaoka, S.; Takahashi, H., P-31-Masnmr Spectroscopic Studies with Zirconium-Phosphate Catalysts. *J Catal* **1986**, *101* (1), 81-89.
11. Clayden, N. J., Solid-State Nuclear-Magnetic-Resonance Spectroscopic Study of Gamma-Zirconium Phosphate. *J Chem Soc Dalton* **1987**, (8), 1877-1881.
12. Hietala, S.; Maunu, S. L.; Sundholm, F.; Jamsa, S.; Viitaniemi, P., Structure of thermally modified wood studied by liquid state NMR measurements. *Holzforschung* **2002**, *56* (5), 522-528.
13. Alberti, G.; Costantino, U.; Marletta, G.; Puglisi, O.; Pignataro, S., ESCA Investigations of Amorphous and Crystalline Zirconium Acid Phosphates. *J Inorg Nucl Chem* **1981**, *43*, 3329-3334.
14. Sanchez, J.; Ramos-Garces, M. V.; Narkeviciute, I.; Colon, J. L.; Jaramillo, T. F., Transition Metal-Modified Zirconium Phosphate Electrocatalysts for the Oxygen Evolution Reaction. *Catalysts* **2017**, *7*.
